# Supplementary material
Source: PubMed Central journal article supplement (PMC3872756)

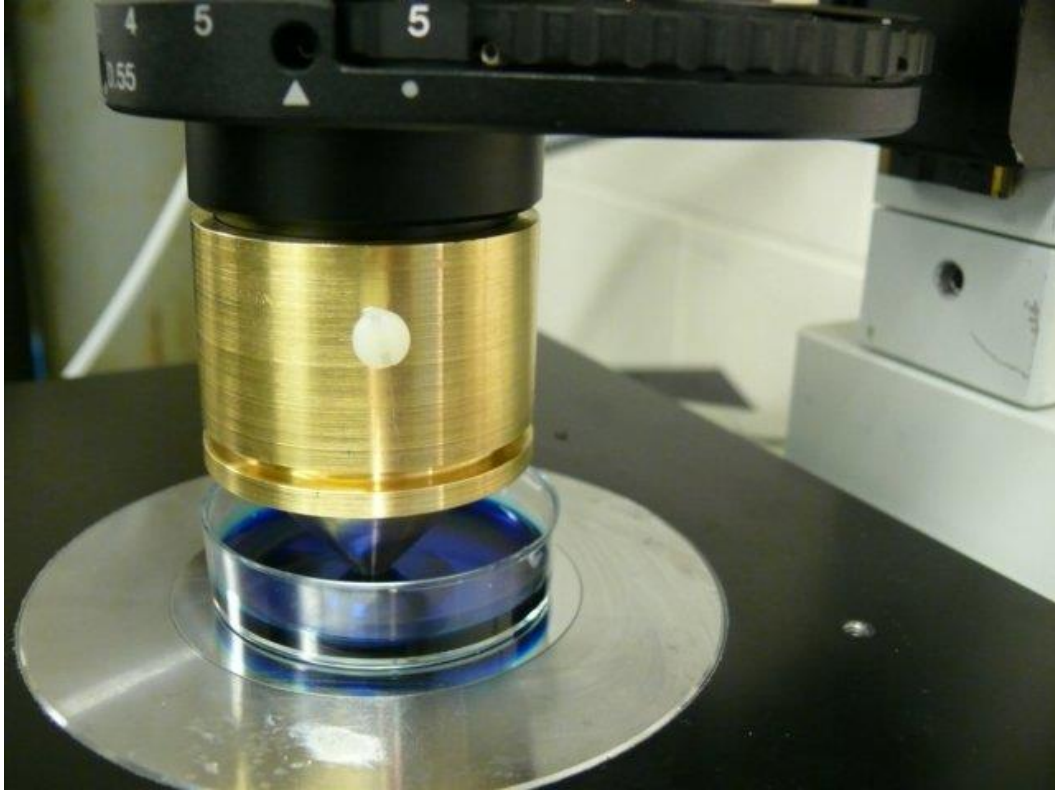

Figure S1. Condenser attachment for TTD imaging in cell culture dishes. See main text for details.

Supplement: tjp0591-5843-SD1.pdf [file tjp0591-5843-SD1.pdf]
